# Supplementary material for: Non-Invasive Mapping of the Gastrointestinal Microbiota Identifies Children with Inflammatory Bowel Disease
Source: PubMed Central journal article supplement (PMC3387146; doi:10.1371/journal.pone.0039242), 2012-06-29

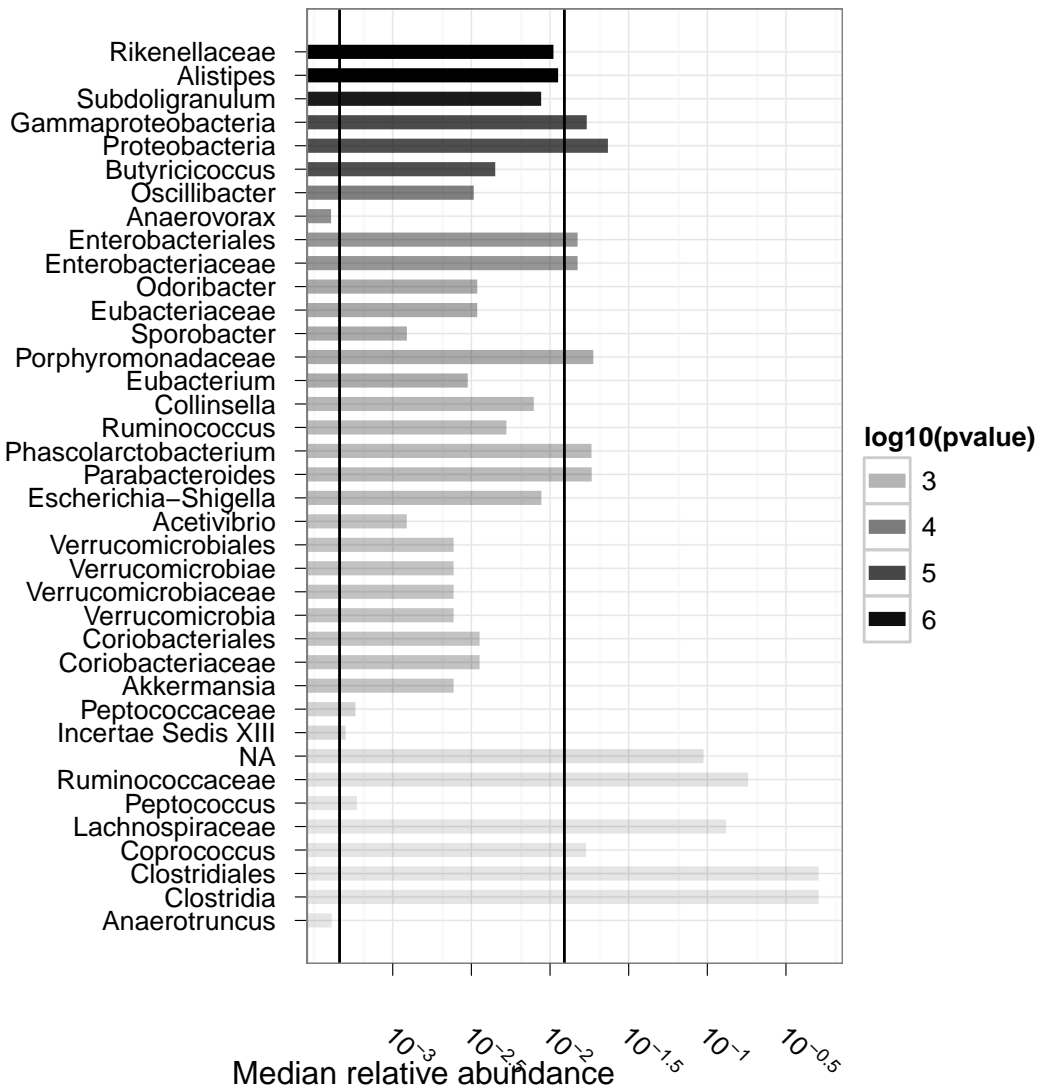

Supplement: pone.0039242.s003.pdf [file pone.0039242.s003.pdf]
