# Supplementary material for: Non-Invasive Mapping of the Gastrointestinal Microbiota Identifies Children with Inflammatory Bowel Disease
Source: PubMed Central journal article supplement (PMC3387146; doi:10.1371/journal.pone.0039242), 2012-06-29

# classification between: ibd/nonibd

AUC = 0.848

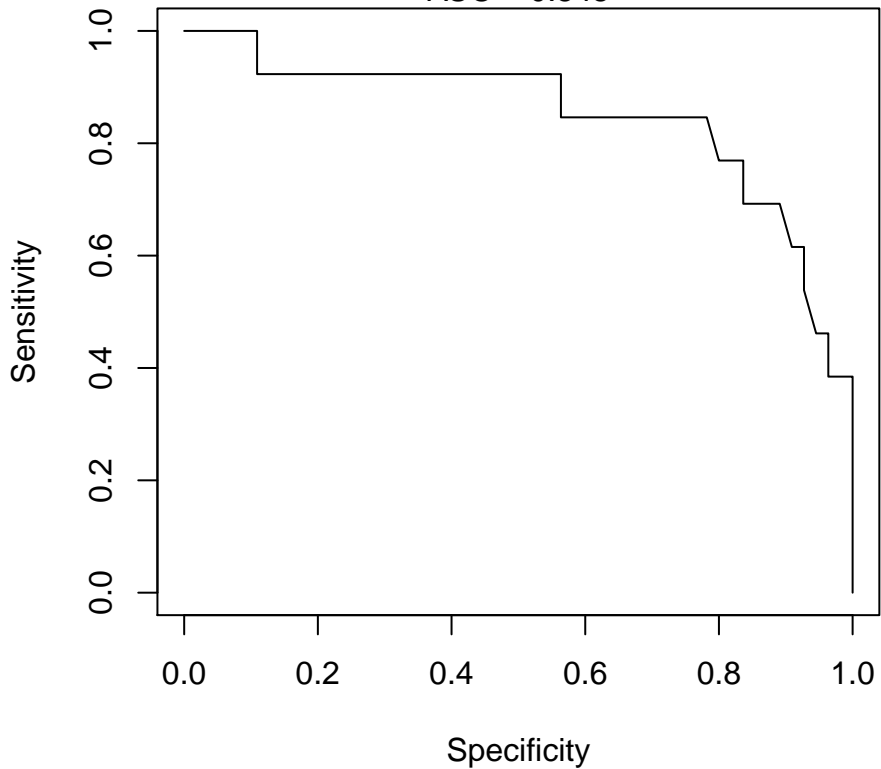

# classification between: CD/not

AUC = 0.580

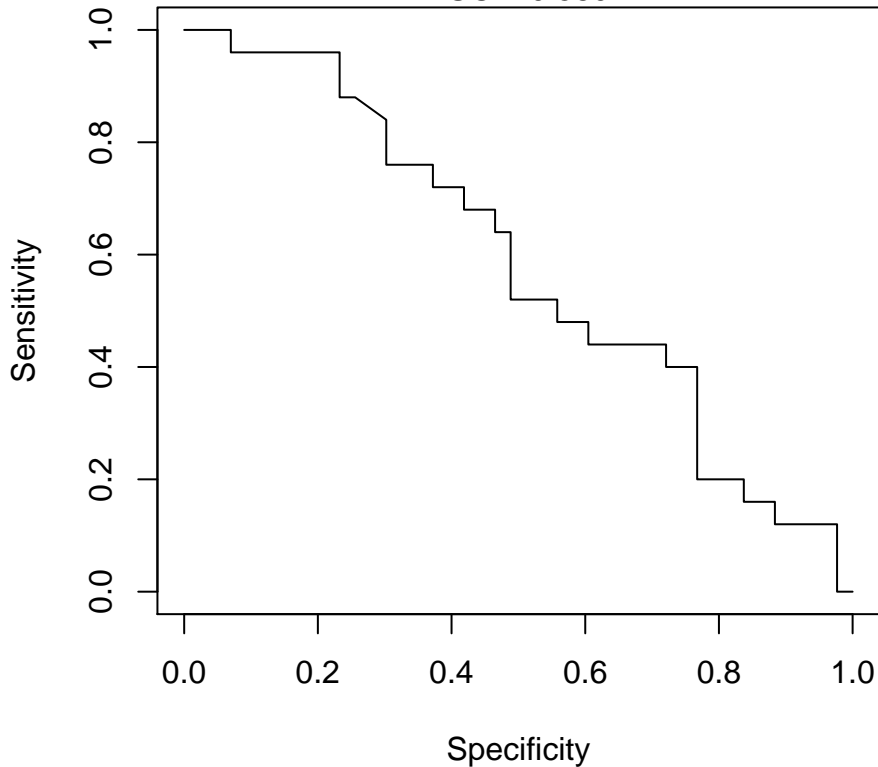

# classification between: not/UC

AUC = 0.668

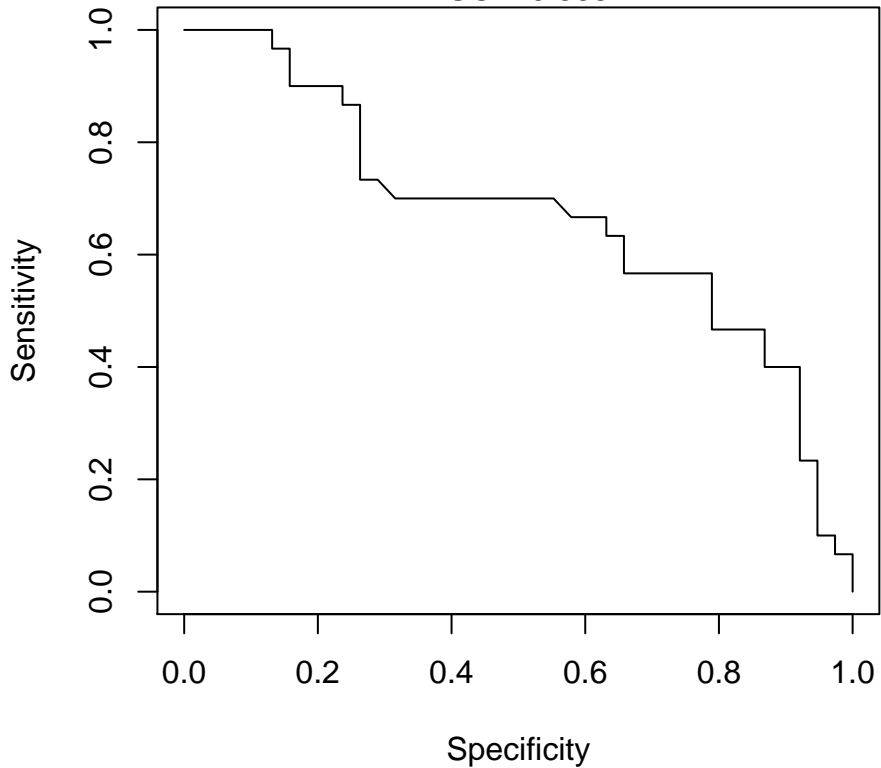

# classification between: Control/not

AUC = 0.853

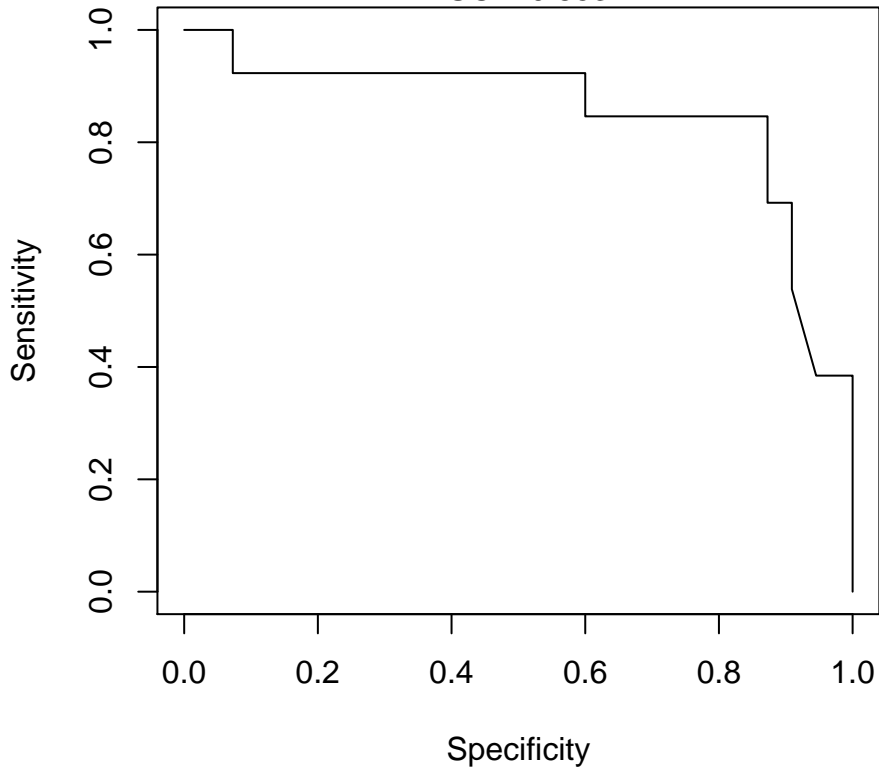

Supplement: pone.0039242.s012.pdf [file pone.0039242.s012.pdf]
